# Supplementary material for: Rapid structural discrimination of IgG antibodies by multicharge-state collision-induced unfolding
Source: Royal Society of Chemistry journal article supplement (doi:10.1039/d1ra06486j), 2021-01-01
Supplement: d1ra06486j1.pdf [file d1ra06486j1.pdf]

Electronic Supplementary Information for

**Rapid structural discrimination of IgG antibodies by  
multicharge-state collision-induced unfolding**

Zhibin Yin <sup>a</sup>, Mingyi Du <sup>a,b</sup>, Dong Chen <sup>a,b</sup>, Wenyang Zhang <sup>a</sup>, Wenjie Huang <sup>a</sup>, Xinzhou  
Wu <sup>b,\*</sup>, and Shijuan Yan <sup>a,\*</sup>

<sup>a</sup> Guangdong Key Laboratory for Crop Germplasm Resources Preservation and Utilization,  
Agro-biological Gene Research Center, Guangdong Academy of Agricultural Sciences,  
Guangzhou, 510640, China

<sup>b</sup> State Key Laboratory for Conservation and Utilization of Subtropical Agro-bioresources  
and Key Laboratory of Natural Pesticide and Chemical Biology of the Ministry of  
Education, South China Agricultural University, Guangzhou, 510642, China

\* E-mail addresses: [wuxz@scau.edu.cn](mailto:wuxz@scau.edu.cn) (X. Wu), [shijuan@agrogene.ac.cn](mailto:shijuan@agrogene.ac.cn) (S. Yan)

## Table of Content

**Fig. S1.** IM-MS drift-time distributions of four IgG subtypes at the charge state of 21+ with collision energy ranging from 10 V to 200 V.

**Fig. S2.** IM-MS drift-time distributions of four IgG subtypes at the charge state of 22+ with collision energy ranging from 10 V to 200 V.

**Fig. S3.** IM-MS drift-time distributions of four IgG subtypes at the charge state of 24+ with collision energy ranging from 10 V to 200 V.

**Fig. S4.** IM-MS drift-time distributions of four IgG subtypes at the charge state of 25+ with collision energy ranging from 10 V to 200 V.

**Fig. S5.** CIU fingerprints and difference plots of IgG2 $\kappa$  with different charge states from 21+ to 25+.

**Fig. S6.** CIU fingerprints and difference plots of IgG3 $\kappa$  with different charge states from 21+ to 25+.

**Fig. S7.** CIU fingerprints and difference plots of IgG4 $\kappa$  with different charge states from 21+ to 25+.

**Fig. S8.** CIU fingerprints and difference plots of four IgG subtypes at the charge state of 21+.

**Fig. S9.** CIU fingerprints and difference plots of four IgG subtypes at the charge state of 22+.

**Fig. S10.** CIU fingerprints and difference plots of four IgG subtypes at the charge state of 24+.

**Fig. S11.** CIU fingerprints and difference plots of four IgG subtypes at the charge state of 25+.

**Table S1.** The detailed instrumental parameters of Synapt G2-Si HDMS.

**Table S2.** The transition voltage required for conformation transition.

**Table S3.** RMSD values acquired from IgG subtypes with different charge states.

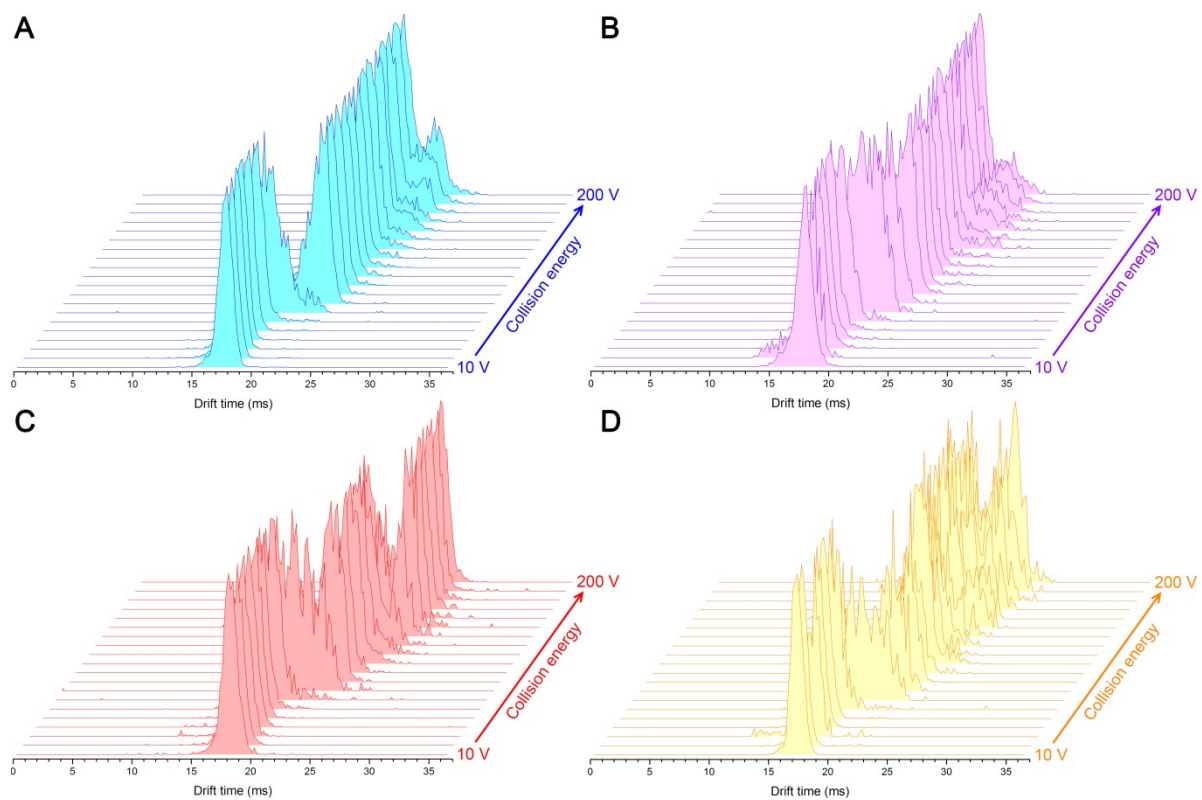

**Fig. S1.** IM-MS drift-time distributions of (A) IgG1 $\kappa$ , (B) IgG2 $\kappa$ , (C) IgG3 $\kappa$ , and (D) IgG4 $\kappa$  at the charge state of 21+ with collision energy ranging from 10 V to 200 V. Each IM-MS spectrum was normalized for different collision energies.

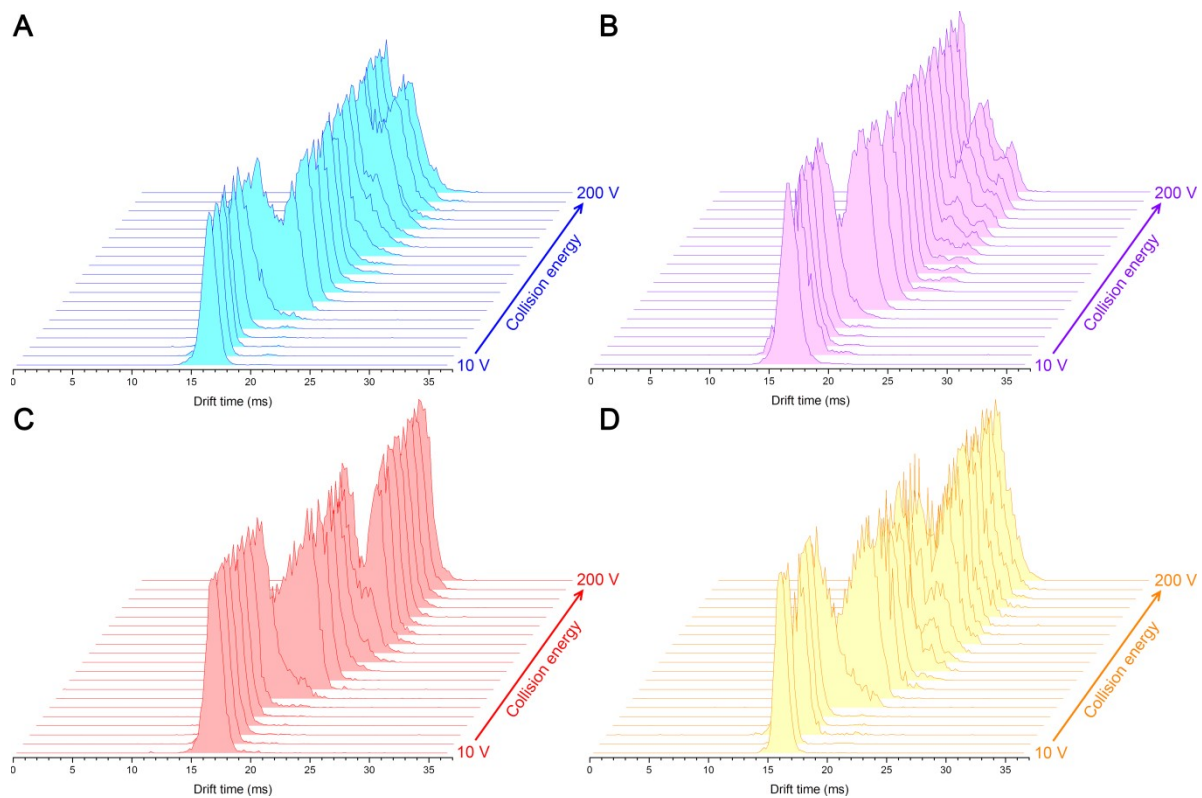

**Fig. S2.** IM-MS drift-time distributions of (A) IgG1 $\kappa$ , (B) IgG2 $\kappa$ , (C) IgG3 $\kappa$ , and (D) IgG4 $\kappa$  at the charge state of 22+ with collision energy ranging from 10 V to 200 V. Each IM-MS spectrum was normalized for different collision energies.

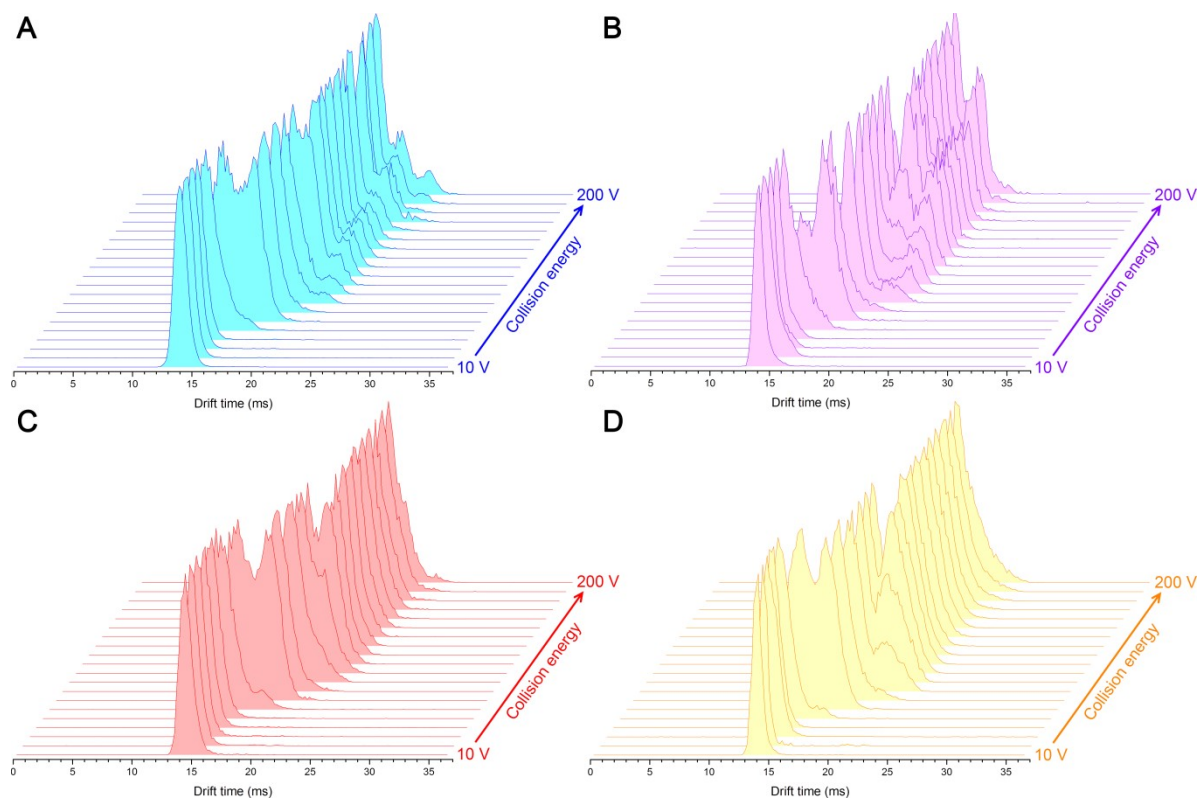

**Fig. S3.** IM-MS drift-time distributions of (A) IgG1 $\kappa$ , (B) IgG2 $\kappa$ , (C) IgG3 $\kappa$ , and (D) IgG4 $\kappa$  at the charge state of 24+ with collision energy ranging from 10 V to 200 V. Each IM-MS spectrum was normalized for different collision energies.

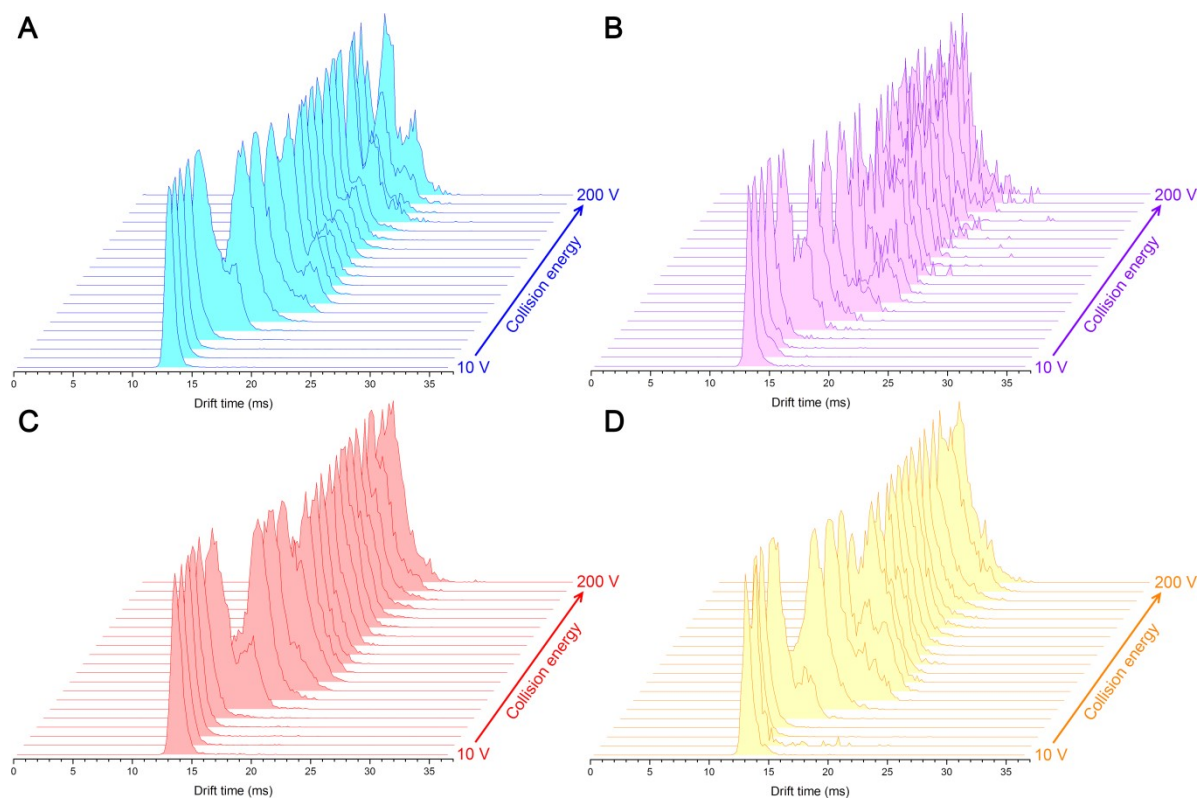

**Fig. S4.** IM-MS drift-time distributions of (A) IgG1 $\kappa$ , (B) IgG2 $\kappa$ , (C) IgG3 $\kappa$ , and (D) IgG4 $\kappa$  at the charge state of 25+ with collision energy ranging from 10 V to 200 V. Each IM-MS spectrum was normalized for different collision energies.

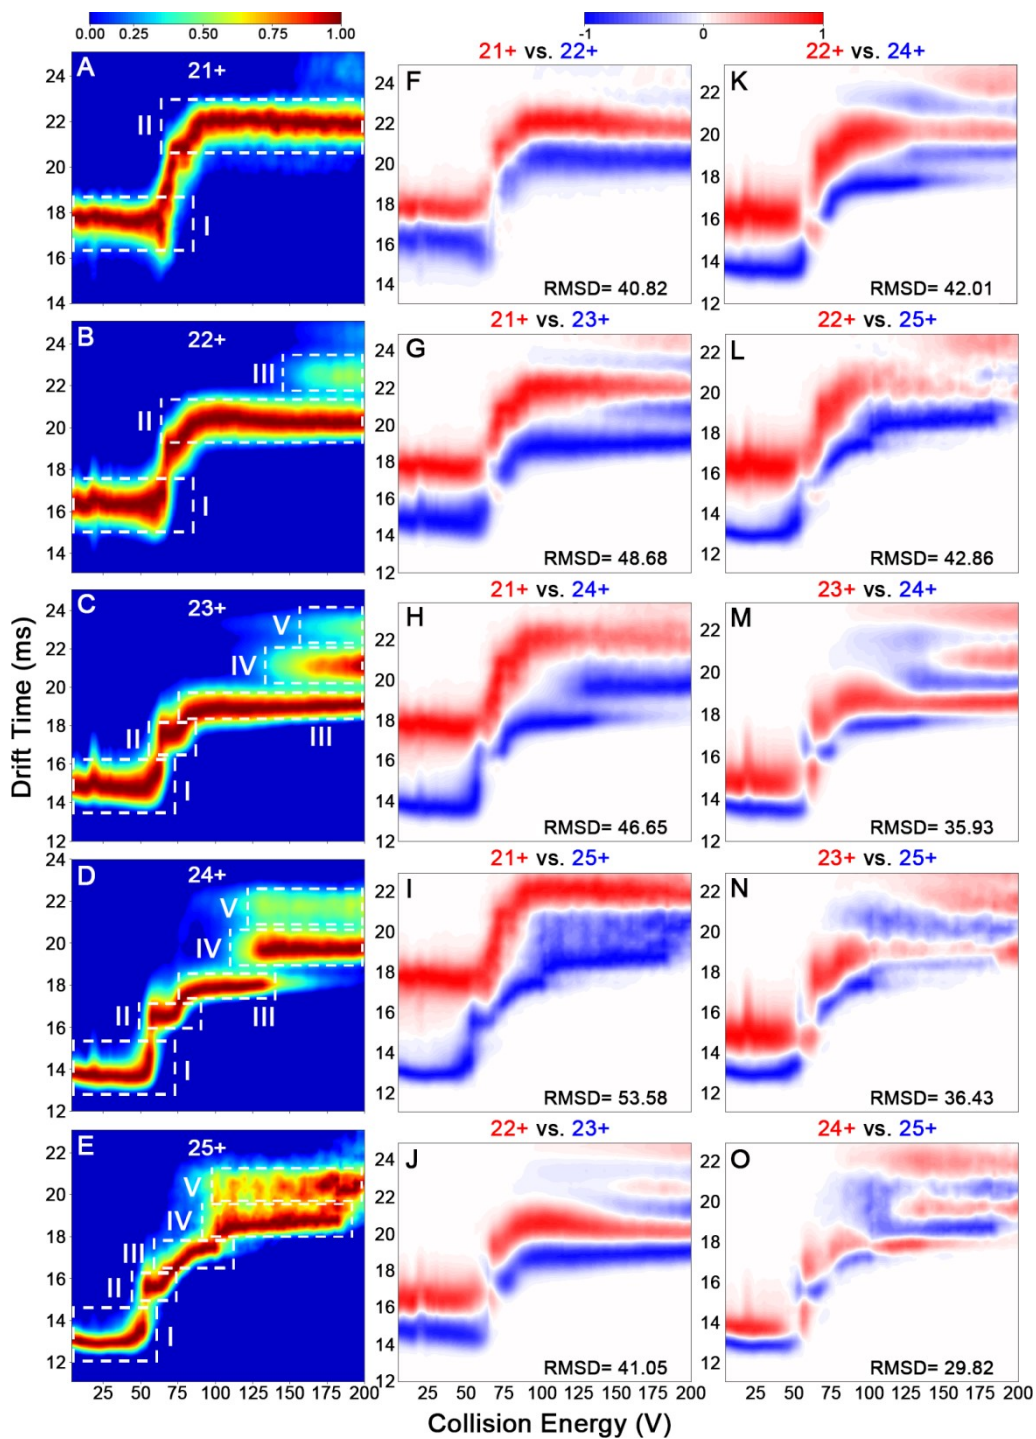

**Fig. S5.** CIU fingerprints of IgG2κ at the charge state of (A) 21+, (B) 22+, (C) 23+, (D) 24+, and (E) 25+. CIU difference plots of (F) 21+ vs. 22+, (G) 21+ vs. 23+, (H) 21+ vs. 24+, (I) 21+ vs. 25+, (J) 22+ vs. 23+, (K) 22+ vs. 24+, (L) 22+ vs. 25+, (M) 23+ vs. 24+, (N) 23+ vs. 25+, and (O) 24+ vs. 25+.



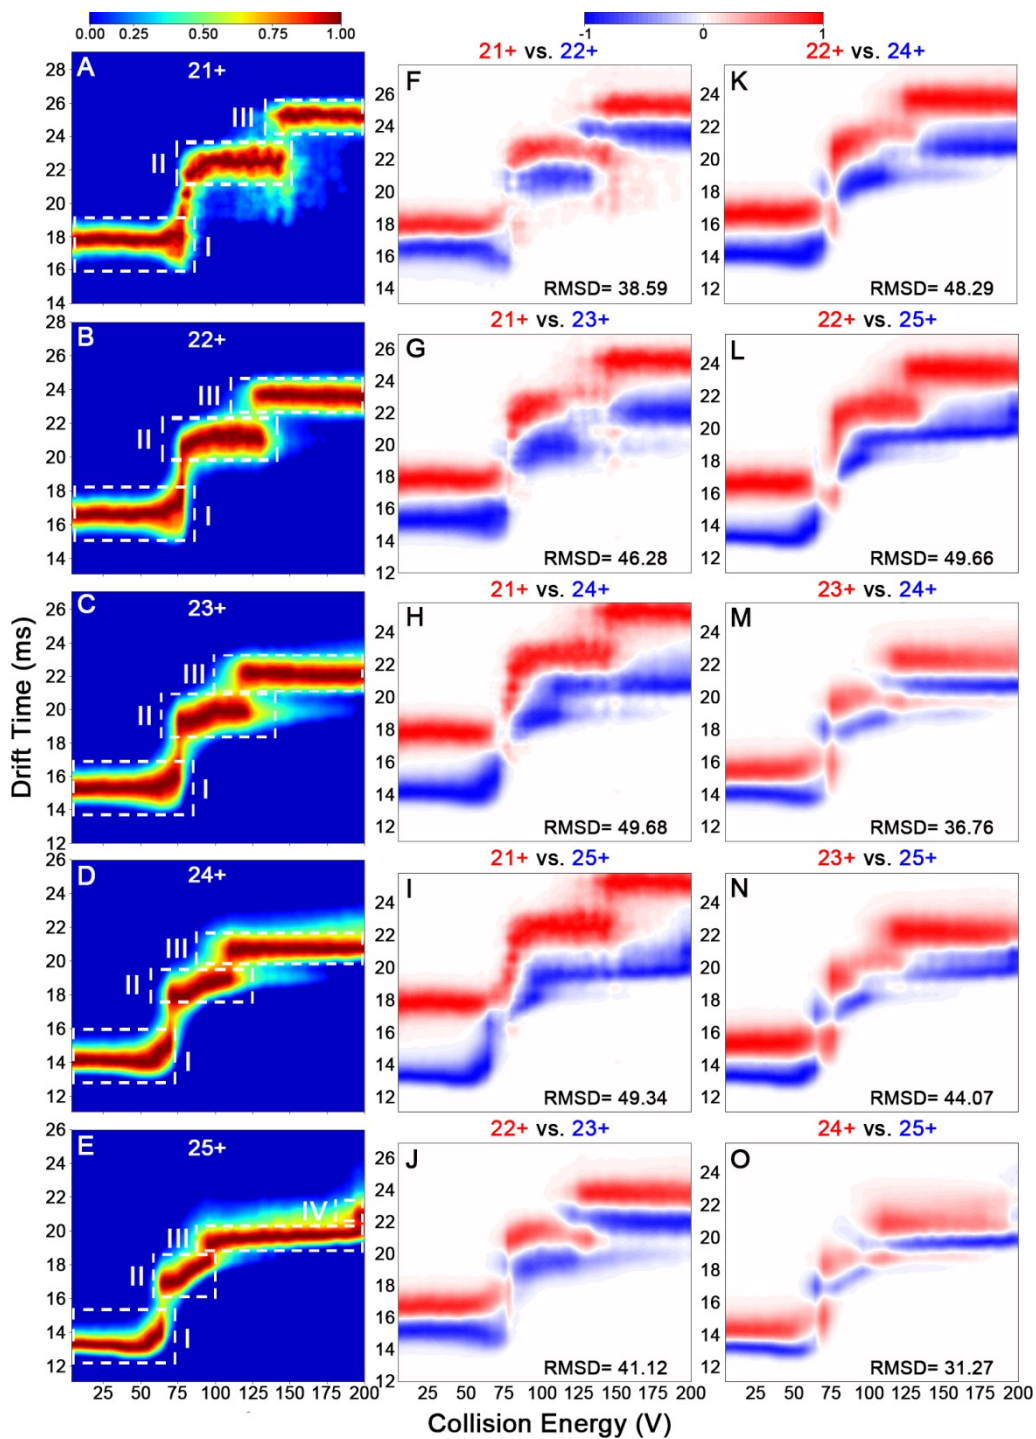

**Fig. S6.** CIU fingerprints of IgG3κ at the charge state of (A) 21+, (B) 22+, (C) 23+, (D) 24+, and (E) 25+. CIU difference plots of (F) 21+ vs. 22+, (G) 21+ vs. 23+, (H) 21+ vs. 24+, (I) 21+ vs. 25+, (J) 22+ vs. 23+, (K) 22+ vs. 24+, (L) 22+ vs. 25+, (M) 23+ vs. 24+, (N) 23+ vs. 25+, and (O) 24+ vs. 25+.



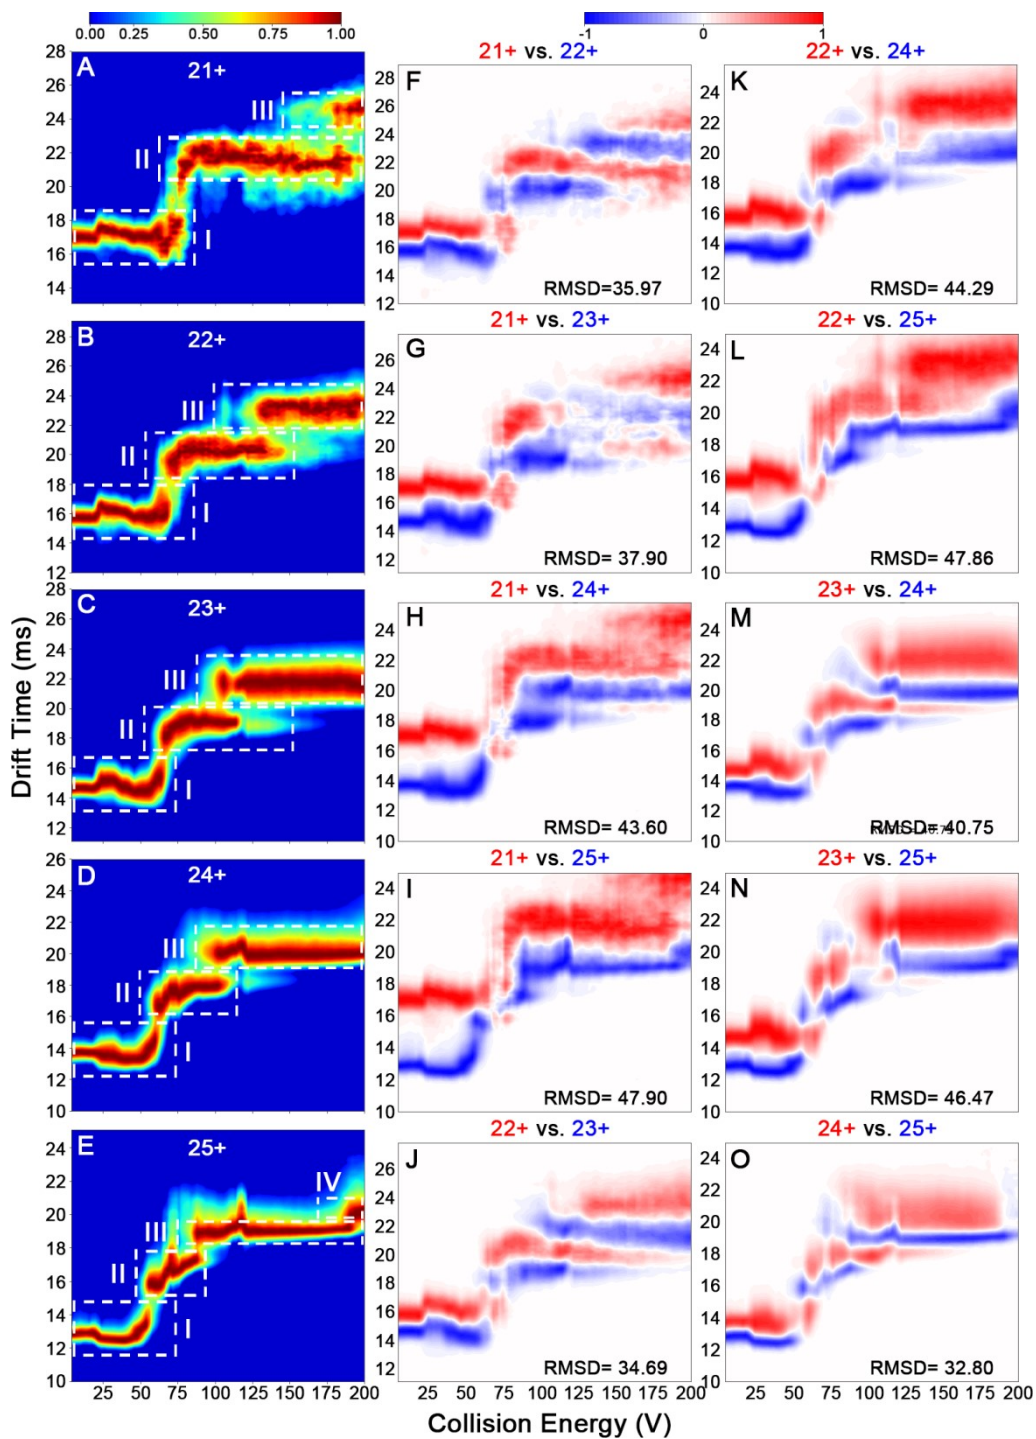

**Fig. S7.** CIU fingerprints of IgG4κ at the charge state of (A) 21+, (B) 22+, (C) 23+, (D) 24+, and (E) 25+. CIU difference plots of (F) 21+ vs. 22+, (G) 21+ vs. 23+, (H) 21+ vs. 24+, (I) 21+ vs. 25+, (J) 22+ vs. 23+, (K) 22+ vs. 24+, (L) 22+ vs. 25+, (M) 23+ vs. 24+, (N) 23+ vs. 25+, and (O) 24+ vs. 25+.

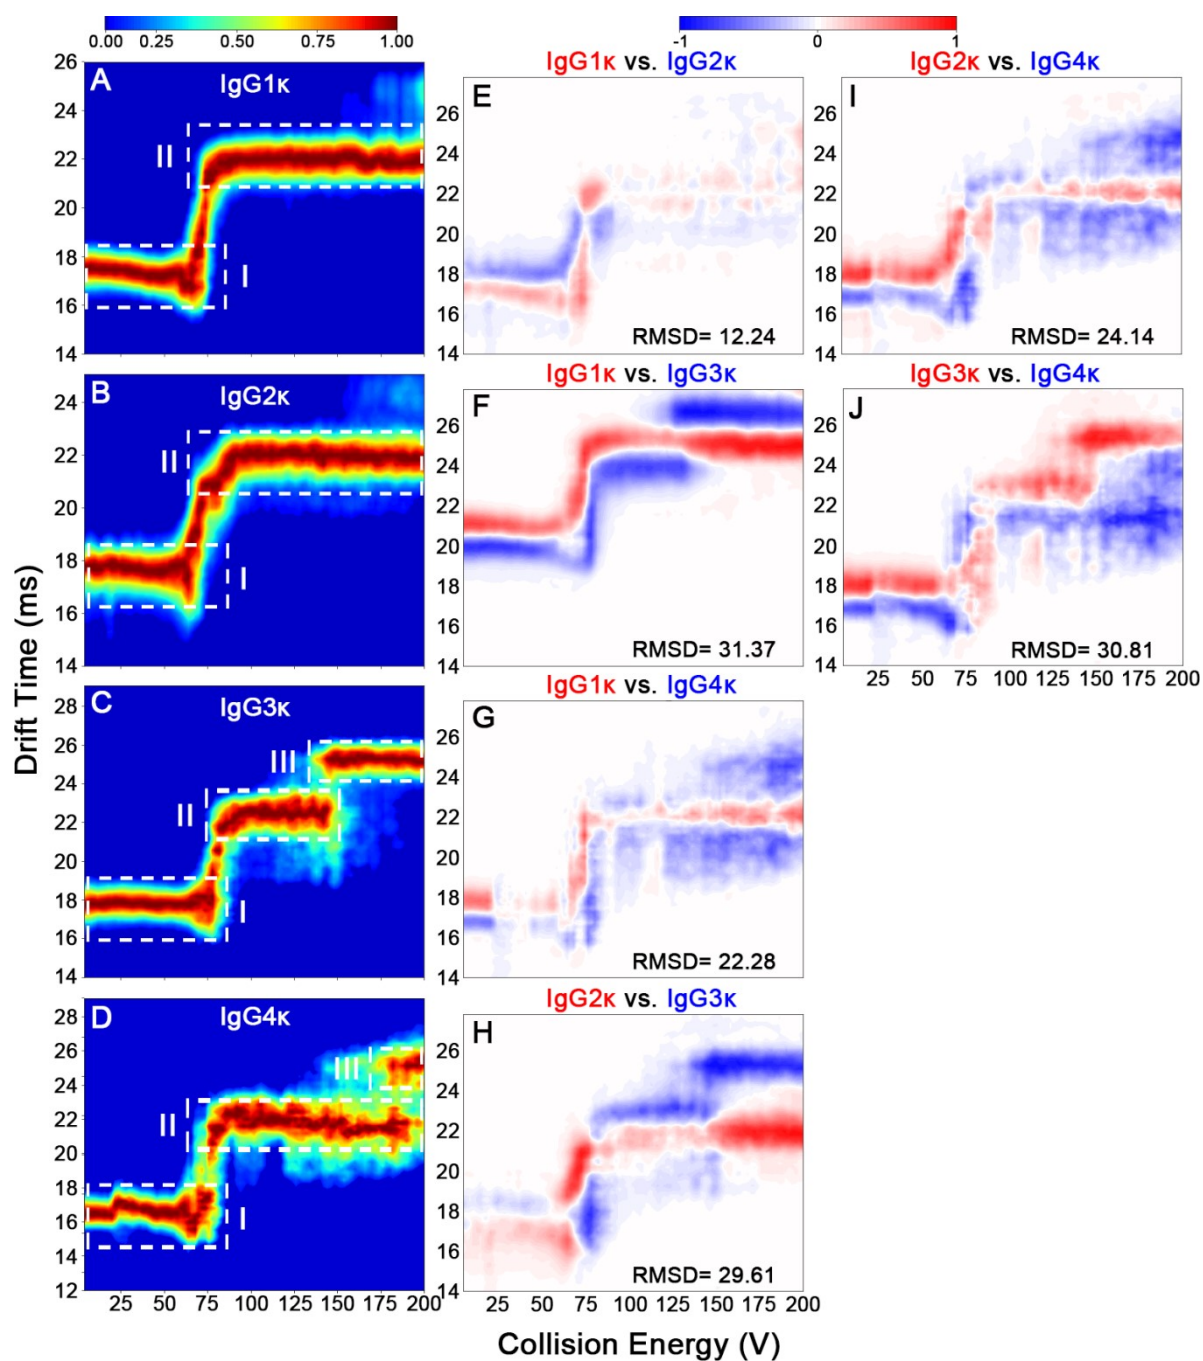

**Fig. S8.** CIU fingerprints of (A) IgG1 $\kappa$ , (B) IgG2 $\kappa$ , (C) IgG3 $\kappa$ , and (D) IgG4 $\kappa$  at the charge state of 21<sup>+</sup>. CIU difference plots of (E) IgG1 $\kappa$  vs. IgG2 $\kappa$ , (F) IgG1 $\kappa$  vs. IgG3 $\kappa$ , (G) IgG1 $\kappa$  vs. IgG4 $\kappa$ , (H) IgG2 $\kappa$  vs. IgG3 $\kappa$ , (I) IgG2 $\kappa$  vs. IgG4 $\kappa$ , (J) IgG3 $\kappa$  vs. IgG4 $\kappa$ .

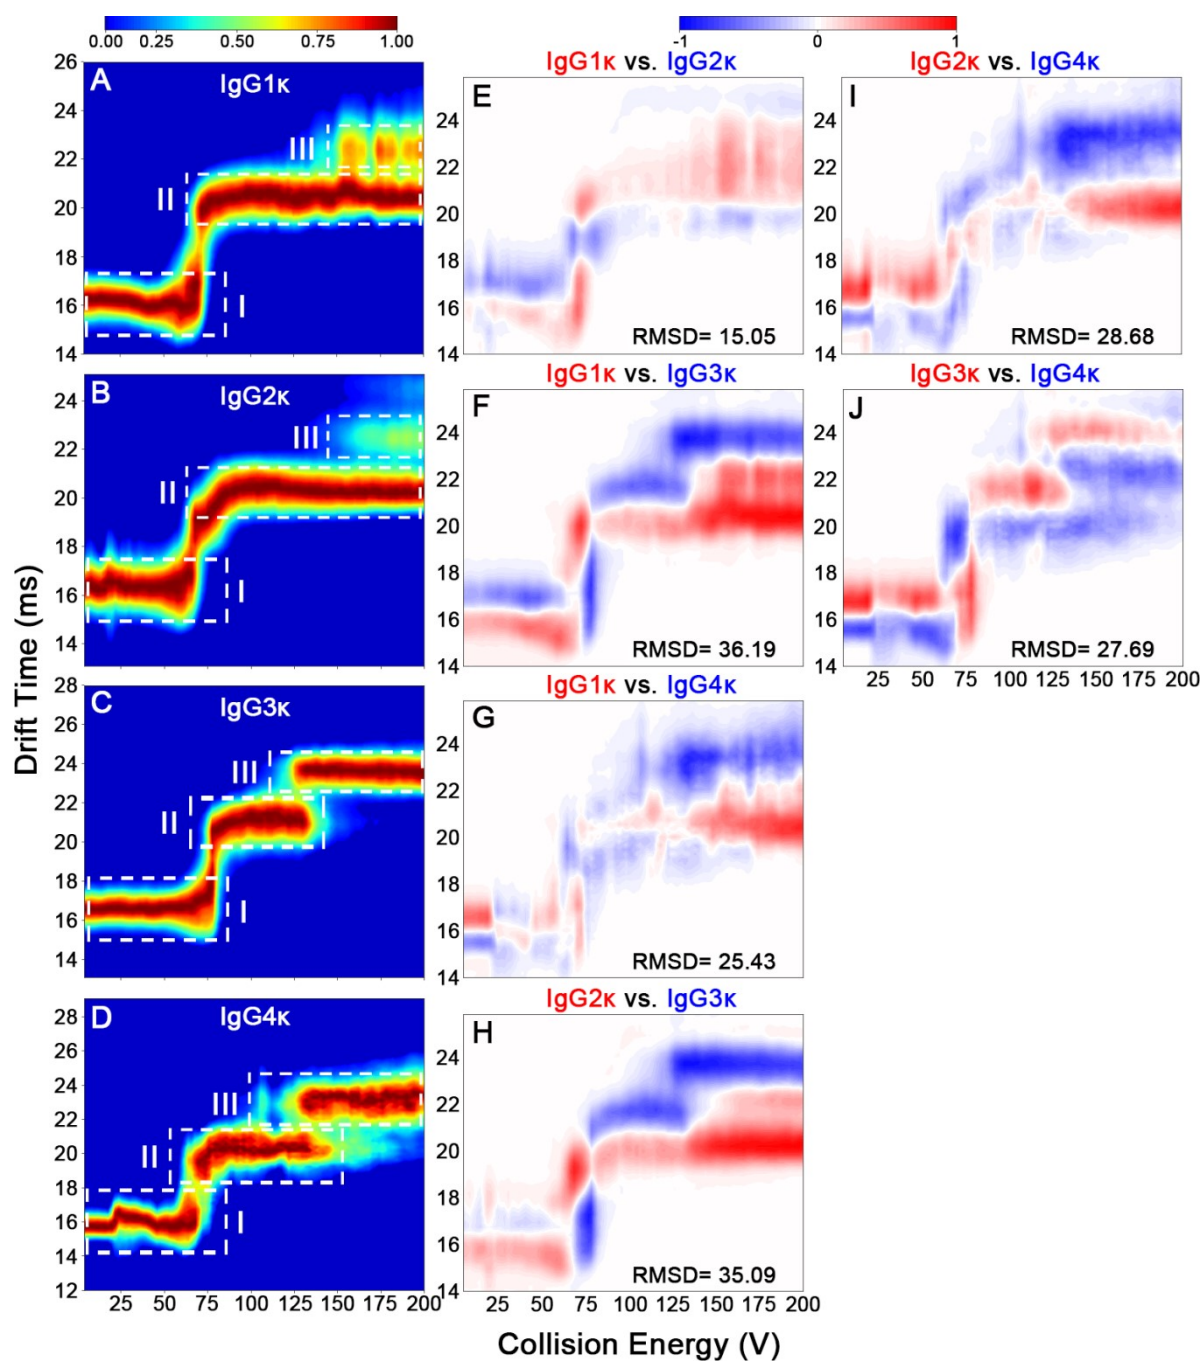

**Fig. S9.** CIU fingerprints of (A) IgG1 $\kappa$ , (B) IgG2 $\kappa$ , (C) IgG3 $\kappa$ , and (D) IgG4 $\kappa$  at the charge state of 22 $^{+}$ . CIU difference plots of (E) IgG1 $\kappa$  vs. IgG2 $\kappa$ , (F) IgG1 $\kappa$  vs. IgG3 $\kappa$ , (G) IgG1 $\kappa$  vs. IgG4 $\kappa$ , (H) IgG2 $\kappa$  vs. IgG3 $\kappa$ , (I) IgG2 $\kappa$  vs. IgG4 $\kappa$ , (J) IgG3 $\kappa$  vs. IgG4 $\kappa$ .



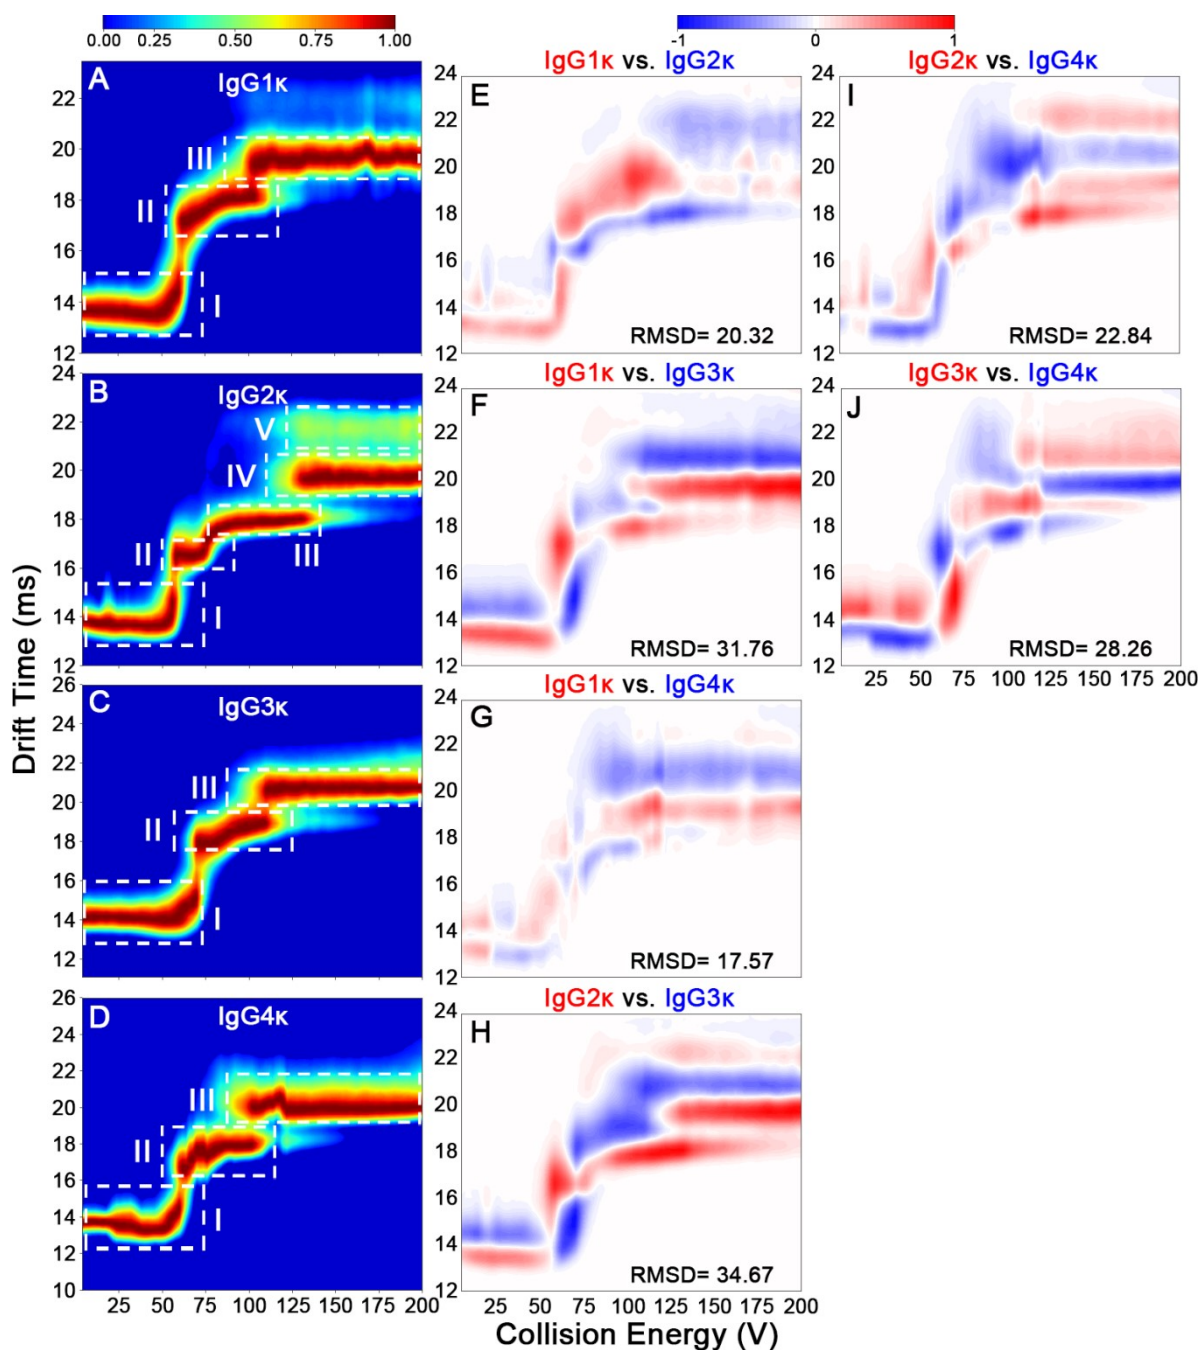

**Fig. S10.** CIU fingerprints of (A) IgG1 $\kappa$ , (B) IgG2 $\kappa$ , (C) IgG3 $\kappa$ , and (D) IgG4 $\kappa$  at the charge state of 24+. CIU difference plots of (E) IgG1 $\kappa$  vs. IgG2 $\kappa$ , (F) IgG1 $\kappa$  vs. IgG3 $\kappa$ , (G) IgG1 $\kappa$  vs. IgG4 $\kappa$ , (H) IgG2 $\kappa$  vs. IgG3 $\kappa$ , (I) IgG2 $\kappa$  vs. IgG4 $\kappa$ , (J) IgG3 $\kappa$  vs. IgG4 $\kappa$ .

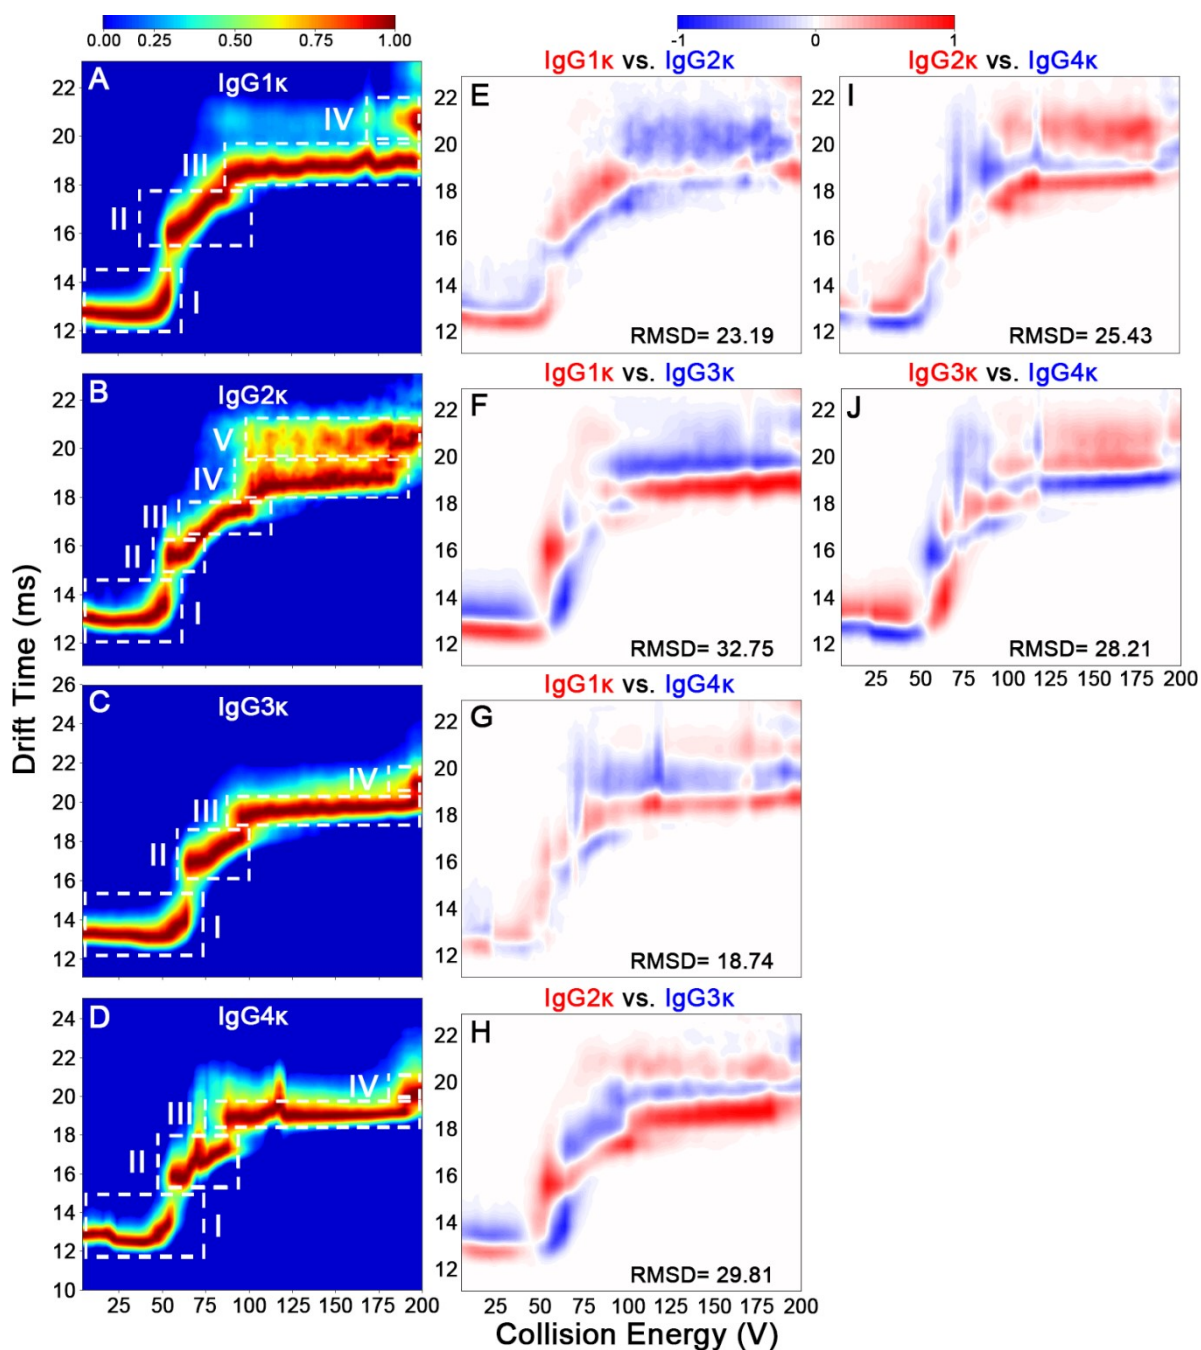

**Fig. S11.** CIU fingerprints of (A) IgG1 $\kappa$ , (B) IgG2 $\kappa$ , (C) IgG3 $\kappa$ , and (D) IgG4 $\kappa$  at the charge state of 25+. CIU difference plots of (E) IgG1 $\kappa$  vs. IgG2 $\kappa$ , (F) IgG1 $\kappa$  vs. IgG3 $\kappa$ , (G) IgG1 $\kappa$  vs. IgG4 $\kappa$ , (H) IgG2 $\kappa$  vs. IgG3 $\kappa$ , (I) IgG2 $\kappa$  vs. IgG4 $\kappa$ , (J) IgG3 $\kappa$  vs. IgG4 $\kappa$ .

**Table S1.** The detailed instrumental parameters of Synapt G2-Si HDMS

| Ion source             | Typical Parameter |
|------------------------|-------------------|
| Capillary Voltage (kV) | 1.2-1.6           |
| Sampling Cone (V)      | 40                |
| Source Offset (V)      | 80                |
| Temperature (°C)       | 30                |
| Cone Gas (L/h)         | 0                 |
| Nano Flow gas (L/h)    | 0                 |
| Purge Gas (L/h)        | 0                 |
| Trap DC                |                   |
| Entrance (V)           | 5.0               |
| Bias (V)               | 50.0              |
| Trap DC (V)            | -2.0              |
| Exit (V)               | 20.0              |
| IMS                    |                   |
| Entrance (V)           | 10.0              |
| Helium Cell DC (V)     | 50.0              |
| Helium Exit (V)        | -40.0             |
| Bias (V)               | 3.0               |
| Exit (V)               | 2.0               |
| Transfer DC            |                   |
| Entrance (V)           | 15.0              |
| Exit (V)               | 15.0              |
| TriWave                |                   |
| Wave Velocity (m/s)    | 250.0             |
| Wave Height (V)        | 2.0               |
| IMS                    |                   |



---

|                     |                         |
|---------------------|-------------------------|
| Wave Velocity (m/s) | 600.0                   |
| Wave Height (V)     | 40.0                    |
| Transfer            |                         |
| Wave Velocity (m/s) | 175.0                   |
| Wave Height (V)     | 12.0                    |
| StepWave 1          |                         |
| Wave Velocity (m/s) | 300.0                   |
| Wave Height (V)     | 10.0                    |
| StepWave 2          |                         |
| Wave Velocity (m/s) | 300.0                   |
| Wave Height (V)     | 0.0                     |
| StepWave DC         |                         |
| StepWave 2 Offset   | 60.0                    |
| Diff Aperture 1     | 10.0                    |
| Diff Aperture 2     | 10.0                    |
| Source Ion Guide    |                         |
| Wave Velocity (m/s) | 300.0                   |
| Wave Height (V)     | 0.0                     |
| RF Setting          |                         |
| StepWave (V)        | 300.0                   |
| Ion Source (V)      | 350.0                   |
| Gas Control         |                         |
| Trap (V)            | 2.0                     |
| Helium Cell (L/h)   | 200.0                   |
| IMS (V)             | 80.0                    |
| MS Profile Type     | Auto Profile            |
| Mass 1              | 1.25 Ma (Low m/z limit) |
| Dwell Time 1        | 25%                     |

---

---

|             |                            |
|-------------|----------------------------|
| Ramp Time 1 | 75%                        |
| Mass 2      | 0.17 Mb (High $m/z$ limit) |

---

**Table S2.** The transition voltage required for conformation transition.

|       | 21+     | 22+     | 23+     | 24+     | 25+     |
|-------|---------|---------|---------|---------|---------|
| IgG1κ | 73.8 V  | 68.5 V  | 66.5 V  | 60.4 V  | 54.4 V  |
|       |         | 145.0   | 134.5 V | 103.3 V | 82.5 V  |
|       |         |         |         |         | 168.5 V |
| IgG2κ | 69.7 V  | 66.8 V  | 62.6 V  | 56.4 V  | 52.7 V  |
|       |         | 155.1 V | 74.9 V  | 74.2 V  | 72.1 V  |
|       |         |         | 132.5 V | 114.5 V | 101.7 V |
|       |         |         | 163.2 V | 120.0 V | 97.6 V  |
| IgG3κ | 77.9 V  | 76.9 V  | 74.9 V  | 70.6 V  | 64.8 V  |
|       | 136.0 V | 122.4 V | 110.2 V | 94.8 V  | 83.1 V  |
|       |         |         |         |         | 169.8 V |
| IgG4κ | 76.8 V  | 65.1 V  | 62.5 V  | 57.5 V  | 54.5 V  |
|       | 150.1 V | 123.8 V | 92.2 V  | 87.5 V  | 82.1 V  |
|       |         |         |         |         | 179.3 V |

**Table S3.** RMSD values acquired from IgG subtypes with different charge states.

|                                 | 21+   | 22+   | 23+   | 24+   | 25+   |
|---------------------------------|-------|-------|-------|-------|-------|
| IgG1 $\kappa$ vs. IgG2 $\kappa$ | 12.24 | 15.05 | 19.45 | 20.32 | 23.19 |
| IgG1 $\kappa$ vs. IgG3 $\kappa$ | 31.37 | 36.19 | 34.73 | 31.76 | 32.75 |
| IgG1 $\kappa$ vs. IgG4 $\kappa$ | 22.28 | 25.43 | 28.67 | 17.57 | 18.74 |
| IgG2 $\kappa$ vs. IgG3 $\kappa$ | 29.61 | 35.09 | 37.05 | 34.67 | 29.81 |
| IgG2 $\kappa$ vs. IgG4 $\kappa$ | 24.14 | 28.68 | 32.34 | 22.84 | 25.43 |
| IgG3 $\kappa$ vs. IgG4 $\kappa$ | 30.81 | 27.69 | 25.74 | 28.26 | 28.21 |
